# Supplementary material
Source: publisher figshare collection journal article supplement (https://gsapubs.figshare.com/articles/dataset/_/12531722)
Supplement: Supplementary file 1 [file 1]

Data Repository Item Mineral20110823NODataSites

|      |                 |                                                    |
|------|-----------------|----------------------------------------------------|
| USGS | 342440080443900 | KER- 433 KERSHAW COUNTY NR LIBERTY HILL (REGOLITH) |
| USGS | 342440080443901 | KER- 435 KERSHAW COUNTY NR LIBERTY HILL (BEDROCK)  |
| USGS | 343021079512202 | DAR- 96                                            |
| USGS | 343907080164400 | CTF- 197                                           |
| USGS | 345051078012109 | DU-157 ROSE HILL RS V32v9 (NC-222R) (SURFICIAL)    |
| USGS | 351134079284901 | MO-245 PINEHURST 2 AT PINEHURST, NC (BLACK CREEK)  |
| USGS | 355659078411401 | WK-375 NORWOOD OAKS, RALEIGH, NC (BEDROCK)         |
| USGS | 355944079013401 | OR-691 DUKE FOREST RS DF-1I NR EUBANKS, NC (TR ZN) |
| USGS | 363342076261101 | 59A 27                                             |
| USGS | 365150076051101 | 62C 73                                             |
| USGS | 365307076055301 | 62D 24                                             |
| USGS | 372543079295402 | 35H 3 SOW 226A                                     |
| USGS | 372543079295403 | 35H 4 SOW 226B                                     |
| USGS | 373316077125202 | 53J 24 SOW 234A                                    |
| USGS | 373316077125203 | 53J 25 SOW 234B                                    |
| USGS | 375635075271501 | 67M 10 SOW 115A                                    |
| USGS | 375635075271502 | 67M 11 SOW 115B                                    |
| USGS | 375635075271503 | 67M 12 SOW 115C                                    |
| USGS | 375635075271505 | 67M 62 SOW 115F                                    |
| USGS | 381010077021901 | 54P 3                                              |
| USGS | 390948078001601 | 46X125                                             |
| USGS | 394008077005601 | CL Ad 47                                           |
| USGS | 394533084113800 | MT-6                                               |
| USGS | 400008079142801 | SO 2 Somerset County Observation Well              |
| USGS | 400229075104601 | PH 1043                                            |
| USGS | 400711074020201 | 250486-- DOE-Sea Girt Obs                          |
| USGS | 401122084143400 | MI-43                                              |
| USGS | 401216080362703 | Brk-0066                                           |
| USGS | 401832074491901 | 210703-- Alliger Obs                               |
| USGS | 403300074202901 | 231491-- MW134A                                    |
| USGS | 405535074073701 | 030617--29 Lori Lane Obs                           |
| USGS | 414630077234901 | TI 349                                             |
| USGS | 414634077235801 | TI 470                                             |
| USGS | 414642077235101 | TI 225                                             |
| USGS | 415150078220401 | MC 126 McKean County Observation Well              |
| USGS | 423827076035901 | Local number, C-586, near McGraw NY                |
| USGS | 422906072124301 | MA-PHW 16 PETERSHAM, MA                            |
| USGS | 424347076530201 | Local number, Se-532, near Romulus, NY             |
