# Supplementary material
Source: publisher figshare collection journal article supplement (https://gsapubs.figshare.com/articles/dataset/_/12531722)
Supplement: Supplementary file 3 [file 1]

Data Repository Item Mineral20110823DataSites

|      |                 |                                                    |
|------|-----------------|----------------------------------------------------|
| USGS | 342543080165800 | CTF- 222                                           |
| USGS | 342543080165801 | CTF- 221                                           |
| USGS | 343023080130600 | CTF- 211                                           |
| USGS | 343105080172100 | CTF- 189                                           |
| USGS | 343736079562200 | CTF- 56                                            |
| USGS | 344000081250011 | CTR- 21                                            |
| USGS | 344314083433201 | 16MM03                                             |
| USGS | 344333080503600 | LAN- 497 LANCASTER COUNTY AIRPORT (REGOLITH)       |
| USGS | 344333080503601 | LAN- 498 LANCASTER COUNTY AIRPORT (BEDROCK)        |
| USGS | 344520079281001 | SC-040 AT LAURINBURG, NC (BLACKCREEK)              |
| USGS | 344544079263701 | SC-142 AT LAURINBURG, NC (BLACKCREEK)              |
| USGS | 345051083041800 | OC- 233                                            |
| USGS | 345145081502900 | SP-1581                                            |
| USGS | 345609080415102 | UN-147 MINERAL SPRINGS RS TRANSITION ZONE WELL     |
| USGS | 345609080415103 | UN-148 MINERAL SPRINGS RS BEDROCK WELL             |
| USGS | 345809077301408 | JO-035 (NC-173), NCDENR COMFORTS (SURFICIAL)       |
| USGS | 345812079313401 | SC-080 (NC-194) NR MARSTON, NC (BLACK CREEK)       |
| USGS | 345830081033100 | YRK-3295 YORK COUNTY AIRPORT (BEDROCK)             |
| USGS | 345830081033101 | YRK-3296 YORK COUNTY AIRPORT (REGOLITH)            |
| USGS | 351020079282801 | MO-244 PINEHURST 6A NR PINEHURST,NC (BLACK CREEK)  |
| USGS | 351121083545002 | CE-029 (NC-192) AT MARBLE, NC (REGOLITH)           |
| USGS | 351126079301401 | MO-246 PINEWILD 1 NR PINEHURST,NC (BLACK CREEK)    |
| USGS | 351132079275301 | MO-248 PINEHURST 5A AT PINEHURST,NC (BLACK CREEK)  |
| USGS | 351218079274401 | MO-250 PINEHURST WELL 22 AT PINEHURST,NC (BLACK CR |
| USGS | 351609079343701 | MO-247 SEVEN LAKES 1 NR WEST END,NC (BLACK CREEK)  |
| USGS | 351709082434101 | TR-066 (NC-147) PISGAH FOREST (ALLUVIUM)           |
| USGS | 351808082374302 | TR-065 (NC-144) AT BLANTYRE, NC(REGOLITH)          |
| USGS | 351849078163901 | WA-154 (NC-148) NR GRANTHAM, NC(SURFICIAL)         |
| USGS | 352012081154301 | GS-289 PASOUR MTN RS REGOLITH WELL, PM-25          |
| USGS | 352012081154302 | GS-290 PASOUR MTN RS TRANSITIONZONE WELL, PM-3     |
| USGS | 352315082484401 | HW-047 (NC-40) CHAMPION WELL NRCRUSO (REGOLITH)    |
| USGS | 353135080524201 | IR-130 LANGTREE RS MW-2S NR MT MOURNE (REGOLITH)   |
| USGS | 353135080524202 | IR-131 LANGTREE RS MW-2I (TRANSITION ZONE)         |
| USGS | 353135080524203 | IR-132 LANGTREE RS MW-2D (QUARTZ DIORITE)          |
| USGS | 353219077153801 | PI-532 (NC-160) NR SIMPSON, NC (SURFICIAL)         |
| USGS | 353922083345600 | Sv:E-002                                           |
| USGS | 354057080362601 | RO-149 (NC-193) PIEDMONT RS 1 NR BARBER (REGOLITH) |
| USGS | 354133082042201 | MC-107 NEAR PLEASANT GARDENS RS, NC (REGOLITH)     |
| USGS | 354133082042203 | MC-109 NEAR PLEASANT GARDENS, NC (BEDROCK)         |
| USGS | 354302081433201 | BK-126 GLEN ALPINE RS NEAR MORGANTON, NC (BEDROCK) |
| USGS | 354302081433202 | BK-127 GLEN ALPINE RS NR MORGANTON, NC (REGOLITH)  |
| USGS | 354404078403101 | WK-284 LAKE WHEELER RD RS MW-3S(REGOLITH)          |
| USGS | 354418076463601 | WS-100 (NC-158) NR HOKE, NC (SURFICIAL)            |
| USGS | 354616081085101 | CW-350 OXFORD RS NR CLAREMONT (TRANSITION ZONE)    |
| USGS | 354616081085102 | CW-351 OXFORD RS NR CLAREMONT, NC (BEDROCK)        |
| USGS | 355031081243202 | CD-101 GRANITE FALLS RS TRANSITION ZONE WELL       |

|      |                 |                                                   |
|------|-----------------|---------------------------------------------------|
| USGS | 355031081243203 | CD-102 GRANITE FALLS RS BEDROCKWELL               |
| USGS | 355359080331701 | DV-025 (NC-142) NR MOCKSVILLE, NC (REGOLITH)      |
| USGS | 360455081530101 | AV-074 (NC-220) LINVILLE RS (BEDROCK)             |
| USGS | 361011079595401 | GU-659 AT OAK RIDGE (REGOLITH)                    |
| USGS | 361307080293101 | YD-200 (NC-221) NCDENR EAST BEND RS (BEDROCK)     |
| USGS | 361829076163201 | PK-141 (NC-195) NR ELIZABETH CITY, NC (SURFICIAL) |
| USGS | 363320076261101 | 59A 39                                            |
| USGS | 363337075595001 | 63A 1                                             |
| USGS | 363337075595002 | 63A 2                                             |
| USGS | 363341076261101 | 59A 30                                            |
| USGS | 363625076522601 | 56A 9 SOW 076A                                    |
| USGS | 363625076522602 | 56A 13 SOW 076B                                   |
| USGS | 363625076522603 | 56A 14 SOW 076C                                   |
| USGS | 363632076580101 | 55A 3 SOW 086                                     |
| USGS | 363928076332901 | 58B 13                                            |
| USGS | 364033076562602 | 55B 65 SOW 145B                                   |
| USGS | 364033076562603 | 55B 66 SOW 145C                                   |
| USGS | 364033076562604 | 55B 67 SOW 145D                                   |
| USGS | 364059076544901 | 55B 16                                            |
| USGS | 364125076544801 | 55B 36                                            |
| USGS | 364126076003501 | 62B 1 SOW 098A                                    |
| USGS | 364218078015701 | 46B 3 SOW 220                                     |
| USGS | 364227076074707 | 61B 13 SOW 091F                                   |
| USGS | 364227076074708 | 61B 14 SOW 091G                                   |
| USGS | 364325076011501 | 62B 22                                            |
| USGS | 364504076031301 | 62C 5 SOW 093                                     |
| USGS | 364558076074401 | 61C 44 SOW 210B                                   |
| USGS | 364558076074501 | 61C 43 SOW 210A                                   |
| USGS | 364608076534601 | 55C 18 SOW 231A                                   |
| USGS | 364608076534602 | 55C 19 SOW 231B                                   |
| USGS | 364642077041602 | 54C 10 SOW 221A                                   |
| USGS | 364642077041603 | 54C 11 SOW 221B                                   |
| USGS | 364642077041604 | 54C 12 SOW 221C                                   |
| USGS | 364642077041605 | 54C 13 SOW 221D                                   |
| USGS | 364703076383702 | 57C 22 SOW 099B                                   |
| USGS | 364703076383703 | 57C 23 SOW 099C                                   |
| USGS | 364713076030701 | 62C 2 SOW 092A                                    |
| USGS | 364715076030801 | 62C 3 SOW 092B                                    |
| USGS | 364745076004302 | 62C 10 SOW 172B                                   |
| USGS | 364745076004303 | 62C 11 SOW 172C                                   |
| USGS | 364745076004304 | 62C 12 SOW 172D                                   |
| USGS | 364814076440701 | 57C 25 SOW 149A                                   |
| USGS | 364814076440702 | 57C 26 SOW 149B                                   |
| USGS | 364814076440704 | 57C 28 SOW 149D                                   |
| USGS | 365133076351202 | 58C 58 SOW 141B                                   |
| USGS | 365133076351203 | 58C 59 SOW 141C                                   |
| USGS | 365307076055302 | 62D 25                                            |

|      |                 |                 |
|------|-----------------|-----------------|
| USGS | 365411076071601 | 62D 20          |
| USGS | 365411076071602 | 62D 21          |
| USGS | 365530077104002 | 53D 6 SOW 179A  |
| USGS | 365530077104006 | 53D 10 SOW 179E |
| USGS | 365530077104007 | 53D 11 SOW 179F |
| USGS | 365751076433501 | 57D 21 SOW 143A |
| USGS | 365751076433502 | 57D 22 SOW 143B |
| USGS | 365751076433503 | 57D 23 SOW 143C |
| USGS | 365756076251201 | 59D 25 SOW 213  |
| USGS | 370053076533901 | 55E 7 SOW 214A  |
| USGS | 370053076533902 | 55E 8 SOW 214B  |
| USGS | 370053076533903 | 55E 9 SOW 214C  |
| USGS | 370604082403901 | 09E 10 SOW 223  |
| USGS | 370712076413203 | 57E 13 SOW 094C |
| USGS | 370812080261901 | 27F 2 SOW 019   |
| USGS | 370841076275204 | 59F 74 SOW 184C |
| USGS | 371122078114401 | 45F 3 SOW 219   |
| USGS | 371208076341102 | 58F 51 SOW 171B |
| USGS | 371208076341103 | 58F 52 SOW 171C |
| USGS | 371208076341104 | 58F 53 SOW 171D |
| USGS | 371208076341105 | 58F 54 SOW 171E |
| USGS | 371208076341106 | 58F 55 SOW 171F |
| USGS | 371543076003401 | 62G 15 SOW 121  |
| USGS | 371644077244601 | 51G 1           |
| USGS | 371653079552101 | 31G 1 SOW 008   |
| USGS | 371841081584201 | 15G 19 SOW 222  |
| USGS | 372053078493801 | 40G 3 SOW 229   |
| USGS | 372145076493201 | 56G 57          |
| USGS | 372150079422301 | 33G 2 SOW 225   |
| USGS | 372223080234801 | 27G 1 SOW 232   |
| USGS | 372224079423601 | 33G 1 SOW 224   |
| USGS | 372322081241501 | Mcd-0204        |
| USGS | 372535076581301 | 55H 23 SOW 233A |
| USGS | 372535076581302 | 55H 24 SOW 233B |
| USGS | 372535076581303 | 55H 25 SOW 233C |
| USGS | 372535076581304 | 55H 26 SOW 233D |
| USGS | 372535076581305 | 55H 27 SOW 233E |
| USGS | 372535076581306 | 55H 28 SOW 233F |
| USGS | 372546076532901 | 55H 20          |
| USGS | 372608078404601 | 41H 3           |
| USGS | 372705075555903 | 63H 6 SOW 103A  |
| USGS | 373054076584501 | 55J 20 SOW 228  |
| USGS | 373146078161201 | 44J 1 SOW 227   |
| USGS | 373737077083201 | 53K 19 SOW 080  |
| USGS | 373758079271601 | 35K 1 SOW 063   |
| USGS | 373839081255201 | Wyo-0148        |
| USGS | 374425075400001 | 65K 27 SOW 114A |

|      |                 |                                 |
|------|-----------------|---------------------------------|
| USGS | 374425075400002 | 65K 28 SOW 114B                 |
| USGS | 374425075400003 | 65K 29 SOW 114C                 |
| USGS | 375006076183101 | 60L 37 SOW 230                  |
| USGS | 375213076190202 | 60L 28 SOW 216A                 |
| USGS | 375213076190203 | 60L 29 SOW 216B                 |
| USGS | 375213076190204 | 60L 30 SOW 216C                 |
| USGS | 375213076190205 | 60L 31 SOW 216D                 |
| USGS | 375213076190206 | 60L 32 SOW 216E                 |
| USGS | 375213076190207 | 60L 33 SOW 216F                 |
| USGS | 375635075271504 | 67M 13 SOW 115D                 |
| USGS | 375723075344404 | 66M 19 SOW 110S                 |
| USGS | 380252079472801 | 32N 2 SOW 217                   |
| USGS | 380653080155301 | Poc-0256                        |
| USGS | 381002078094201 | 45P 1 SOW 030                   |
| USGS | 381110076550501 | 55P 5                           |
| USGS | 381132076551001 | 55P 9                           |
| USGS | 381447081393101 | Kan-0946                        |
| USGS | 382008080292801 | Web-0167                        |
| USGS | 382150078424001 | 41Q 1                           |
| USGS | 382205082304501 | Way-0144                        |
| USGS | 382523078535501 | 38P 1 SOW 070                   |
| USGS | 383423077245901 | 51S 7                           |
| USGS | 383638082103300 | G-2                             |
| USGS | 384821078472301 | 40U 3 SOW 218                   |
| USGS | 384957077481701 | 48U 26 SOW 215                  |
| USGS | 385041075395602 | Mc51-01a                        |
| USGS | 385607074555201 | 090150-- West Cape May 1 Obs    |
| USGS | 385607077381101 | 49V 1                           |
| USGS | 385638077220101 | 52V 2D                          |
| USGS | 385709074512801 | 090302-- Coast Guard 800 Obs    |
| USGS | 385804074574201 | 090049-- Higbee Beach 3 Obs     |
| USGS | 385849079563901 | Bar-0136                        |
| USGS | 390002074541002 | 090304-- Airport Rio Grande Obs |
| USGS | 390012074472001 | 090337-- N Wildwood 800 Obs     |
| USGS | 390156074533401 | 090333-- Pump Pond N Obs        |
| USGS | 390211074505502 | 090081-- Cape May 23 Obs        |
| USGS | 390333078370801 | Hrd-0301                        |
| USGS | 390348078035501 | 46W175                          |
| USGS | 390422074544701 | 090306-- Oyster 800 Obs         |
| USGS | 390425074544601 | 090089-- Oyster Lab 4 Obs       |
| USGS | 390608074483801 | 090099-- Cape May Co Pk 8 Obs   |
| USGS | 390623077314201 | 50W 4C                          |
| USGS | 390743077504501 | 48X 20                          |
| USGS | 390841082535800 | PI-3                            |
| USGS | 391020080244101 | Har-0165                        |
| USGS | 391145074520401 | 090510-- Belleplain MW44        |
| USGS | 391308081064201 | Rit-0116                        |

|      |                 |                                      |
|------|-----------------|--------------------------------------|
| USGS | 391542077423801 | 49Y 1 SOW 022                        |
| USGS | 391621074435401 | 090186-- Ac 14 Obs                   |
| USGS | 391827074371001 | 010578-- Jobs Point Obs              |
| USGS | 391828075120902 | 110096-- Jones Island 2 Obs          |
| USGS | 391920078032201 | Ber-0840                             |
| USGS | 392016082272400 | V-100                                |
| USGS | 392017074300201 | 010834-- Margate Firehouse 1 Obs     |
| USGS | 392032074300801 | 010702-- Burk Ave TW Obs             |
| USGS | 392045076512501 | BA Ea 18                             |
| USGS | 392200078532001 | Min-0173                             |
| USGS | 392232074234403 | 010778-- Egg Harbor Hs Shallow       |
| USGS | 392512074521206 | 110137-- Ragovin 2100 Obs            |
| USGS | 392553081281600 | WA-2                                 |
| USGS | 392725077582401 | Ber-0445                             |
| USGS | 392731075092401 | 110042-- Vocational School 2 Obs     |
| USGS | 392732075092401 | 110043-- Vocational School 1 Obs     |
| USGS | 392733075092401 | 110044-- Vocational School 3 Obs     |
| USGS | 392754074270101 | 010180-- Oceanville 1 Obs            |
| USGS | 392757077501001 | Jef-0797                             |
| USGS | 392808084283600 | BU-32                                |
| USGS | 392902084255900 | BU-282                               |
| USGS | 392920074570001 | 110237-- Natural Area 1 Obs          |
| USGS | 393055075083501 | 330841-- Parvin Sp 1 Obs (OW A)      |
| USGS | 393115074191001 | 291210-- Great Bay Blvd 1 Obs        |
| USGS | 393153083322000 | FA-1                                 |
| USGS | 393232074263901 | 010703-- Faa Pomona Obs              |
| USGS | 393232074263903 | 010776-- FAA Shallow Obs             |
| USGS | 393246075012701 | 150372-- Newfield 2-A Obs            |
| USGS | 393318084190100 | W-10                                 |
| USGS | 393333074442401 | 010256-- Scholler 1 Obs              |
| USGS | 393348075275701 | 330251-- Salem 1 Obs                 |
| USGS | 393749074550901 | 151213-- Und06                       |
| USGS | 393814079484601 | Mng-0585                             |
| USGS | 394037075191501 | 330187-- Point Airy Obs              |
| USGS | 394106074362501 | 050570-- Mount Obs                   |
| USGS | 394119075062701 | 151126-- Glassboro MI-1 Obs          |
| USGS | 394215074561701 | 070476-- New Brooklyn Park 1 Obs     |
| USGS | 394215074561702 | 070477-- New Brooklyn Park 2 Obs     |
| USGS | 394215074561703 | 070478-- New Brooklyn Park 3 Obs     |
| USGS | 394221075072201 | 151054-- Rowan-1 Shallow Obs         |
| USGS | 394236075272101 | 330342-- Penns Grove 24              |
| USGS | 394256075101001 | 151208-- Ag02                        |
| USGS | 394336074161201 | 291433-- Stafford MW5 Obs            |
| USGS | 394354075025901 | 151033-- Washington Twp 1 Obs        |
| USGS | 394422074430903 | 050409-- Atsion 3 Obs                |
| USGS | 394430077225001 | AD 808 Adams County Observation Well |
| USGS | 394442084111600 | MT-426                               |

|      |                 |                                         |
|------|-----------------|-----------------------------------------|
| USGS | 394452074281901 | 050628-- Penn Sf Shallow Obs            |
| USGS | 394513074280601 | 050630-- Penn Sf Deep Obs               |
| USGS | 394652075100401 | 150741-- Mantua Shallow Obs             |
| USGS | 394652075100402 | 150742-- Mantua Deep Obs                |
| USGS | 394655080014301 | GR 118 Greene County Observation Well   |
| USGS | 394742074142002 | 290514-- Garden St Pky 2 Obs            |
| USGS | 394755078135001 | FU 249 Fulton County Observation Well   |
| USGS | 394800074524601 | 051387-- Evesham 4 Obs                  |
| USGS | 394808075172401 | 150712-- Stefka 1 Obs                   |
| USGS | 394808075172402 | 150713-- Stefka 2 Obs                   |
| USGS | 394808075172404 | 150728-- Stefka 4 Obs                   |
| USGS | 394829074053503 | 290019-- Island Beach 3 Obs             |
| USGS | 394843079351401 | FA 17 Fayette County Observation Well   |
| USGS | 394904074253601 | 051391-- Coyle 2 Obs (OW 96)            |
| USGS | 394915084103300 | MT-73                                   |
| USGS | 394922074563301 | 070412-- Elm Tree 2 Obs                 |
| USGS | 394922074563302 | 070413-- Elm Tree 3 Obs                 |
| USGS | 394957075053001 | 150671-- Deptford Deep Obs              |
| USGS | 395028074104401 | 290585-- DOE-Forked River Obs           |
| USGS | 395034074112101 | 291419-- MW61                           |
| USGS | 395122074301701 | 050683-- Butler Place 1 Obs             |
| USGS | 395122074301702 | 050684-- Butler Place 2 Obs             |
| USGS | 395150074284201 | 050689-- Lebanon Sf 23-D Obs            |
| USGS | 395206075111801 | 150772-- National Park #3-OW-Al         |
| USGS | 395229074571201 | 070117-- Hutton Hill 1 Obs              |
| USGS | 395229074571202 | 070118-- Hutton Hill 2 Obs              |
| USGS | 395309074352101 | 051389-- New Lisbon 1 Obs               |
| USGS | 395309074352102 | 051390-- New Lisbon 2 Obs               |
| USGS | 395315074494601 | 051155-- Medford MW-1                   |
| USGS | 395316083593100 | CL-11                                   |
| USGS | 395322077365301 | FR 818 Franklin County Observation Well |
| USGS | 395450075485401 | CH 10 Chester County Observation Well   |
| USGS | 395512075293701 | DE 723 Delaware County Observation Well |
| USGS | 395524074502501 | 050258-- Medford 1 Obs                  |
| USGS | 395524074502502 | 050259-- Medford 2 Obs                  |
| USGS | 395525074502505 | 050261-- Medford 5 Obs                  |
| USGS | 395525074502601 | 050262-- Medford 4 Obs                  |
| USGS | 395609074124001 | 290534-- Toms River 2 Obs               |
| USGS | 395846077040601 | AD 146 Adams County Observation Well    |
| USGS | 395847084085500 | MI-3A                                   |
| USGS | 395920079021501 | SO 854 Somerset County Observation Well |
| USGS | 395928074502701 | 051476-- Rancocas St Pk MW3             |
| USGS | 395930074142101 | 290085-- Toms River 84 Obs              |
| USGS | 400010074521601 | 050645-- Willingboro 2 Obs              |
| USGS | 400120074265401 | 291059-- Rlf-30 Obs                     |
| USGS | 400148074352001 | 051250-- McGuire 08-MW-52               |
| USGS | 400148074352101 | 051251-- McGuire 08-MW-102              |

|      |                 |          |                                      |
|------|-----------------|----------|--------------------------------------|
| USGS | 400209077183301 | CU 2     | Cumberland County Observation Well   |
| USGS | 400210074031001 | 290503-- | Mantoloking 6 Obs                    |
| USGS | 400217078281901 | BD 150   | Bedford County Observation Well      |
| USGS | 400232074213201 | 291060-- | Lnas-Ec Obs                          |
| USGS | 400233080261301 | WS 155   | Washington County Observation Well   |
| USGS | 400242074422301 | 050440-- | Rhodia 1 Obs                         |
| USGS | 400416074270101 | 290138-- | Colliers Mills 1 Obs                 |
| USGS | 400416074270103 | 290140-- | Colliers Mills 3 Obs                 |
| USGS | 400540082540400 | FR-523   | AT NGWA                              |
| USGS | 400832074082101 | 250429-- | Allaire State Park C Obs             |
| USGS | 400916076492301 | YO 1147  | York County Observation Well         |
| USGS | 401105074120201 | 250635-- | Howell Twp 1 Obs                     |
| USGS | 401105074120202 | 250636-- | Howell Twp 2 Obs                     |
| USGS | 401105074120203 | 250637-- | Howell Twp 3 Obs                     |
| USGS | 401105074120204 | 250638-- | Howell Twp 4 Obs                     |
| USGS | 401105074120205 | 250639-- | Howell Twp 5 Obs                     |
| USGS | 401157075032001 | BK 1020  | Bucks County Observation Well        |
| USGS | 401229074290001 | 250800-- | MW72                                 |
| USGS | 401542074053001 | 250353-- | Fort Monmouth 1-Nco Obs              |
| USGS | 401552074501801 | 210028-- | Civil Defense Obs                    |
| USGS | 401637076071501 | LN 1351  | Lancaster County Observation Well    |
| USGS | 401733075171401 | MG 917   | Montgomery County Observation Well   |
| USGS | 401753074483501 | 210289-- | Bristol-Myers 100 Obs                |
| USGS | 401804074432601 | 210364-- | Cranston Farms 15 Obs                |
| USGS | 401834074515501 | 210366-- | Wash Crossing Pk 14 Obs              |
| USGS | 401843078075401 | HU 301   | Huntingdon County Observation Well   |
| USGS | 401906074151401 | 250250-- | Village 215 Obs                      |
| USGS | 401934074485901 | 210704-- | Scotch Rd Obs                        |
| USGS | 402109074301301 | 230291-- | Forsgate 1 Obs                       |
| USGS | 402109074301302 | 230292-- | Forsgate 2 Obs                       |
| USGS | 402138074435801 | 210365-- | Carter Rd Obs                        |
| USGS | 402138079031802 | WE 300   | Westmoreland County Observation Well |
| USGS | 402143074185201 | 230104-- | Morrell 1 Obs                        |
| USGS | 402151074525301 | 190251-- | Corsalo Rd 1 Obs                     |
| USGS | 402207076180801 | LB 372   | Lebanon County Observation Well      |
| USGS | 402208074145201 | 250272-- | Marlboro 1 Obs                       |
| USGS | 402208074505801 | 210705-- | Gomez Tract Obs                      |
| USGS | 402255076422001 | DA 868   | Dauphin County Observation Well      |
| USGS | 402350073583901 | 250771-- | Sandy Hook 2 Obs                     |
| USGS | 402411077374801 | JU 351   | Juniata County Observation Well      |
| USGS | 402426074001901 | 250715-- | Atlantic Highlands B Obs             |
| USGS | 402452078271301 | BA 74    | Blair County Observation Well        |
| USGS | 402512074414301 | 350139-- | MW109                                |
| USGS | 402553074271701 | 230070-- | Fischer Obs                          |
| USGS | 402615075530501 | BE 623   | Berks County Observation Well        |
| USGS | 402643075150501 | BK 929   | Bucks County Observation Well        |
| USGS | 402644074563601 | 190002-- | Bird Obs                             |

|      |                 |                                               |
|------|-----------------|-----------------------------------------------|
| USGS | 402735077100901 | PE 684 Perry County Observation Well          |
| USGS | 402750078452201 | CA 462 Cambria County Observation Well        |
| USGS | 403006080252301 | BV 156 Beaver County Observation Well         |
| USGS | 403200074420601 | 350138-- MW110                                |
| USGS | 403429075392401 | LE 644 Lehigh County Observation Well         |
| USGS | 403455074514801 | 190276-- Environmental Ctr 1 Obs              |
| USGS | 403517074452501 | 190270-- Readington 11 Obs                    |
| USGS | 403719075091801 | 410387-- MW82                                 |
| USGS | 403734080063001 | AG 700 Allegheny County Observation Well      |
| USGS | 403939076591001 | SN 130 Snyder County Observation Well         |
| USGS | 404014074585401 | 190495-- NJWSA TW-B                           |
| USGS | 404106074171901 | 390119-- Union County Park Obs                |
| USGS | 404140077354001 | MF 344 Mifflin County Observation Well        |
| USGS | 404239076362001 | NU 567 Northumberland County Observation Well |
| USGS | 404455074203202 | 130096-- East Orange Shallow Obs              |
| USGS | 404556077525101 | CE 686 Centre County Observation Well         |
| USGS | 404639074230001 | 270012-- Briarwood School Obs                 |
| USGS | 404648083412600 | HN-2A                                         |
| USGS | 404655081553100 | WN-8                                          |
| USGS | 404708076070701 | SC 296 Schuylkill County Observation Well     |
| USGS | 404745075184001 | NP 820 Northampton County Observation Well    |
| USGS | 404934074400501 | 271190-- Black River 10 Obs                   |
| USGS | 405027074232301 | 270020-- Troy Meadows 1 Obs                   |
| USGS | 405123074375701 | 271191-- Roxbury 1 Obs                        |
| USGS | 405320078483901 | IN 919 Indiana County Observation Well        |
| USGS | 405344079380201 | AR 109 Armstrong County Observation Well      |
| USGS | 405414074354201 | 271192-- Morris Maint Yd 22 Obs               |
| USGS | 405531074361901 | 270027-- Berkshire Valley 9 Obs               |
| USGS | 405613074430901 | 370359-- PW-1 Obs                             |
| USGS | 405808074583001 | 410349-- Blairstown 1 Obs                     |
| USGS | 405928077115501 | UN 51 Union County Observation Well           |
| USGS | 410005074473801 | 370203-- Whittingham 19 Obs                   |
| USGS | 410123075425401 | CB 104 Carbon County Observation Well         |
| USGS | 410155074060201 | 030289-- Saddle River 17 Obs                  |
| USGS | 410207074270001 | 270028-- Green Pond 5 Obs                     |
| USGS | 410431074395801 | 370204-- Sparta 6 Obs                         |
| USGS | 410449074483301 | 370205-- Swartswood Park 5 Obs                |
| USGS | 410501079524401 | BT 311 Butler County Observation Well         |
| USGS | 410538080280801 | LA 1201 Lawrence County Observation Well      |
| USGS | 410627078313601 | CF 321 Clearfield County Observation Well     |
| USGS | 410628073413301 | CT- GW 21 GREENWICH, CT                       |
| USGS | 410705076334901 | CO 589 Columbia County Observation Well       |
| USGS | 410727076402901 | MT 258 Montour County Observation Well        |
| USGS | 410804074424401 | 370206-- Fairgrounds 7 Obs                    |
| USGS | 410853073554001 | Local number, Ro-543, at Rockland Lake NY     |
| USGS | 410914074540401 | 370202-- Taylor Obs                           |
| USGS | 410928074522801 | 370207-- Walpack Twp 4 Obs                    |



|      |                 |                                                  |
|------|-----------------|--------------------------------------------------|
| USGS | 411223075234901 | MO 190 Monroe County Observation Well            |
| USGS | 411421073481202 | Local number, We-5020, YorktownHeights NY        |
| USGS | 411424077462201 | CN 1 Clinton County Observation Well             |
| USGS | 411438081085200 | PO-124                                           |
| USGS | 411734078522101 | JE 425 Jefferson County Observation Well         |
| USGS | 411756076162701 | LU 294 Luzerne County Observation Well           |
| USGS | 411802073593001 | Local number, Ro-18, Bear Mtn State Park NY      |
| USGS | 411819082493900 | E-10                                             |
| USGS | 411833075133601 | PI 522 Pike County Observation Well              |
| USGS | 411958079540202 | VE 57 Venango County Observation Well            |
| USGS | 412020079133901 | CR 3 Clarion County Observation Well             |
| USGS | 412149073445601 | Local number, P-1217, Carmel NY                  |
| USGS | 412427076594401 | LY 112 Lycoming County Observation Well          |
| USGS | 412458078324601 | EK 108 Elk County ObservationWell                |
| USGS | 412637074362301 | Local number, O-2271, Myers Grove NY             |
| USGS | 412714073331301 | Local number, P-1205, at PutnamLake NY           |
| USGS | 412732078034201 | CM 13 Cameron County Observation Well            |
| USGS | 412739080104201 | MR 3306 Mercer County Observation Well           |
| USGS | 412823079030601 | FO 11 Forest County Observation Well             |
| USGS | 412825072410501 | CT-D 117 DURHAM                                  |
| USGS | 412916073121701 | CT-SB 42 SOUTHBURY, CT                           |
| USGS | 413026076352901 | SU 34 Sullivan County Observation Well           |
| USGS | 413346075421301 | LK 508 Lackawanna County Observation Well        |
| USGS | 413428074085701 | Local number, O-2288, Town of Montgomery NY      |
| USGS | 413535072253701 | CT-MB 32 MARLBOROUGH, CT                         |
| USGS | 413542080245002 | CW 413 Crawford County Observation Well          |
| USGS | 414128073475201 | Local number, Du-1009, State Pk, Pleasant Valley |
| USGS | 414159079213601 | WR 50 Warren County Observation Well             |
| USGS | 414330076280501 | BR 92 Bradford County Observation Well           |
| USGS | 414333075153201 | WN 64 Wayne County Observation Well              |
| USGS | 414429074052001 | Local number, U-1620, SUNY New Paltz NY          |
| USGS | 414513077333701 | TI 100 Tioga County Observation Well             |
| USGS | 414525074360601 | Local number, Sv-535, Woodbourne, NY             |
| USGS | 414640077493801 | PO 72 Potter County Observation Well             |
| USGS | 414737073563301 | Local number, Du-321, near HydePark NY           |
| USGS | 414741072134501 | CT-MS 44 MANSFIELD, CT                           |
| USGS | 414831072173002 | CT- MS 80 MANSFIELD, CT                          |
| USGS | 414948074035001 | Local number, U-1619, Tillson NY                 |
| USGS | 415323077451301 | SQ 61 Susquehanna County Observation Well        |
| USGS | 415607080044601 | ER 82 Erie County Observation Well               |
| USGS | 420143079171401 | Local number, Cu-862, near Busti NY              |
| USGS | 420326079295801 | Local number, Cu-5, near PanamaNY                |
| USGS | 420530078445201 | Local number, Ct-121, near Red House NY          |
| USGS | 420828076484601 | Local number, Cm-622, near Horseheads NY         |
| USGS | 421138075511301 | Local number, Bm-128, Kattelville NY             |
| USGS | 421157075535401 | Local number, Bm-129, near Castle Creek NY       |
| USGS | 421213076313301 | Local number, Ti-891, near Spencer NY            |

|      |                 |                                                   |
|------|-----------------|---------------------------------------------------|
| USGS | 421512077472801 | Local number, Ag-261, at AlfredNY                 |
| USGS | 421544078021301 | Local number, Ag-262, near Belmont NY             |
| USGS | 421556075281602 | Local number, Cn-12, near Bainbridge              |
| USGS | 421746074180201 | Local number, G-831, near Ashland NY              |
| USGS | 421903074152301 | Local number, G-644, Windham NY                   |
| USGS | 421948074483701 | Local number, D-503, BloomvilleNY                 |
| USGS | 421948074483702 | Local number, D-522, BloomvilleNY                 |
| USGS | 422103072241102 | MA-PDW 23 PELHAM, MA                              |
| USGS | 422241073274601 | Local number, Cb-1071, Canaan NY                  |
| USGS | 422323076190301 | Local number, Tm-1968, nr Slaterville Springs, NY |
| USGS | 422445077203301 | Local number, Sb-472, near Kanona NY              |
| USGS | 422622073410901 | Local number, Cb-1072, at Niverville NY           |
| USGS | 422702079005101 | Local number, Ct-2498, near Perrysburg NY         |
| USGS | 422710076462901 | Local number, Sy-706, near Burdett NY             |
| USGS | 422745073112001 | MA-PTW 51 PITTSFIELD, MA                          |
| USGS | 422920076275301 | Local number, Tm-985, near Ithaca, New York       |
| USGS | 423143076582601 | Local number, Ya-180, Dundee NY                   |
| USGS | 423530074191701 | Local number, So-604, at Middleburgh NY           |
| USGS | 423534073423401 | Local number, Re-703, East Greenbush NY           |
| USGS | 423743078070802 | Local number, Wo-4, near Gainesville NY           |
| USGS | 424017074301501 | Local number, So-602, SUNY Cobleskill NY          |
| USGS | 424115073495301 | Local number, A-654, SUNY Albany NY               |
| USGS | 424136075025101 | Local number, Og-23, near Hartwick NY             |
| USGS | 424158076251901 | Local number, Cy-7, near Moravia NY               |
| USGS | 424311073423901 | Local number, A-666, WatervlietNY                 |
| USGS | 424347076530202 | Local number, Se-533, near Romulus, NY            |
| USGS | 424452076081902 | Local number, C-998, near Preble NY               |
| USGS | 424859073585501 | Local number, Sn-730, Schenectady NY              |
| USGS | 425048073472501 | Local number, Sa-1285, Clifton Park NY            |
| USGS | 425448076350002 | Local number, Cy-223, at AuburnNY                 |
| USGS | 425511074254001 | Local number, Mt-411, at Randall NY               |
| USGS | 425704078360601 | Local number, E-1196 near Clarence, NY            |
| USGS | 425803077151201 | Local number, Ot-1133, near Manchester NY         |
| USGS | 425833077503901 | Local number, Lv-330, CaledoniaNY                 |
| USGS | 425840077133901 | Local number, Ot-900, near Manchester NY          |
| USGS | 425846075504501 | Local number, M-292, near Chittenango Falls, NY   |
| USGS | 425913078085501 | Local number, Gs-190, at Batavia NY               |
| USGS | 430056075354102 | Local number, M-178, Valley Mills NY              |
| USGS | 430243076180401 | Local number, Od-1825, CamillusNY                 |
| USGS | 430243076180402 | Local number, Od-1833, CamillusNY                 |
| USGS | 430252077283402 | Local number, Mo-11, near Powder Mill Park        |
| USGS | 430327073475401 | Local number, Sa-529, Saratoga Springs NY         |
| USGS | 430739078502701 | Local number, Ni-869, at Shawnee NY               |
| USGS | 430924078241301 | Local number, Ol-27, near West Shelby NY          |
| USGS | 431030073192101 | Local number, W-533, Salem NY                     |
| USGS | 431045078160401 | Local number, Ol-20, Barre NY                     |
| USGS | 431227075233301 | Local number, Oe-1457, Rome NY                    |

|      |                 |                                          |
|------|-----------------|------------------------------------------|
| USGS | 431308078544501 | Local number, Ni-70, near Ransomville NY |
| USGS | 431359075235501 | Local number, Oe-1466, Rome NY           |
| USGS | 431841074573201 | Local number, He-627, Ohio NY            |
| USGS | 432148076225101 | Local number, Ow-5013, near Volney NY    |
| USGS | 432148076225102 | Local number, Ow-5014, near Volney NY    |
| USGS | 432832074122201 | Local number, H-3, near GriffinNY        |
| USGS | 433001073474701 | Local number, Wr-80, Warrensburg NY      |
